# Supplementary material for: A.R.R.O.W.2: once- vs twice-weekly carfilzomib, lenalidomide, and dexamethasone in relapsed/refractory multiple myeloma
Source: PubMed Central journal article supplement — Blood Adv. 2024 Jul 22;8(19):5012–21. doi: 10.1182/bloodadvances.2024013101 (PMC11465039; doi:10.1182/bloodadvances.2024013101), 2024-07-22
Supplement: BLOODA_ADV-2024-013101-mmc1.pdf [file BLOODA_ADV-2024-013101-mmc1.pdf]

**A.R.R.O.W.2: Once- vs twice-weekly carfilzomib, lenalidomide, and dexamethasone in relapsed/refractory multiple myeloma**

Meletios A. Dimopoulos, Daniel Coriu, Sosana Delimpasi, Ivan Spicka, Terry Upchurch, Belle Fang, Rakhshandra Talpur, Edward Faber, Meral Beksac, and Xavier Leleu

**Supplemental Data**

**Supplemental Table 1. Grade  $\geq$  3 TEAEs in  $\geq$  5% of patients**

|                                                      | <b>Twice-weekly KRd27<br/>(N = 231)<br/>n (%)</b> | <b>Once-weekly KRd56<br/>(N = 223)<br/>n (%)</b> |
|------------------------------------------------------|---------------------------------------------------|--------------------------------------------------|
| Number of patients who reported grade $\geq$ 3 TEAEs | 144 (62.3)                                        | 141 (63.2)                                       |
| Neutropenia                                          | 57 (24.7)                                         | 54 (24.2)                                        |
| Thrombocytopenia                                     | 24 (10.4)                                         | 27 (12.1)                                        |
| Anemia                                               | 20 (8.7)                                          | 26 (11.7)                                        |
| Hypertension                                         | 23 (10.0)                                         | 21 (9.4)                                         |
| Pneumonia                                            | 7 (3.0)                                           | 12 (5.4)                                         |

d, dexamethasone; K, carfilzomib; R, lenalidomide; TEAE, treatment-emergent adverse event.

**Supplemental Table 2. Treatment-emergent SAEs in  $\geq 2\%$  of patients**

|                                                         | <b>Twice-weekly<br/>KRd27<br/>(N = 231)<br/>n (%)</b> | <b>Once-weekly<br/>KRd56<br/>(N = 223)<br/>n (%)</b> |
|---------------------------------------------------------|-------------------------------------------------------|------------------------------------------------------|
| Number of patients who reported treatment-emergent SAEs | 75 (32.5)                                             | 84 (37.7)                                            |
| Pneumonia                                               | 9 (3.9)                                               | 12 (5.4)                                             |
| COVID-19 pneumonia                                      | 11 (4.8)                                              | 8 (3.6)                                              |
| COVID-19                                                | 3 (1.3)                                               | 6 (2.7)                                              |

COVID-19, coronavirus disease 2019; d, dexamethasone; K, carfilzomib; R, lenalidomide; SAE, serious adverse event.

**Supplemental Table 3. TEAEs of interest of any grade in  $\geq 5\%$  of patients**

|                                   | Twice-weekly KRd27 (N = 231)* | Once-weekly KRd56 (N = 223)† |
|-----------------------------------|-------------------------------|------------------------------|
| TEAEs of interest, n (%)          |                               |                              |
| Neutropenia                       | 74 (32.0)                     | 65 (29.1)                    |
| Hypertension                      | 56 (24.2)                     | 48 (21.5)                    |
| Upper respiratory tract infection | 33 (14.3)                     | 32 (14.3)                    |
| Pneumonia                         | 18 (7.8)                      | 16 (7.2)                     |

d, dexamethasone; K, carfilzomib; R, lenalidomide; TEAE, treatment-emergent adverse event.

\*One patient experienced grade 2 left ventricular failure.

†Two patients experienced ejection fraction decreased, and one patient experienced grade 1 left ventricular hypertrophy.

**Supplemental Table 4. Fatal TEAEs**

|                                     | <b>Twice-weekly KRd27<br/>(N = 231)<br/>n (%)</b> | <b>Once-weekly KRd56<br/>(N = 223)<br/>n (%)</b> |
|-------------------------------------|---------------------------------------------------|--------------------------------------------------|
| Fatal TEAEs                         | 10 (4.3)                                          | 12 (5.4)                                         |
| COVID-19 pneumonia                  | 1 (0.4)                                           | 4 (1.8)                                          |
| Death                               | 0 (0.0)                                           | 3 (1.3)                                          |
| COVID-19                            | 1 (0.4)                                           | 1 (0.4)                                          |
| Plasma cell myeloma                 | 1 (0.4)                                           | 1 (0.4)                                          |
| Cardiac arrest                      | 0 (0.0)                                           | 1 (0.4)                                          |
| Hyperglycemia                       | 0 (0.0)                                           | 1 (0.4)                                          |
| Septic shock                        | 0 (0.0)                                           | 1 (0.4)                                          |
| Pneumonia                           | 3 (1.3)                                           | 0 (0.0)                                          |
| Heart failure                       | 1 (0.4)                                           | 0 (0.0)                                          |
| Hepatorenal syndrome                | 1 (0.4)                                           | 0 (0.0)                                          |
| Multiple organ dysfunction syndrome | 1 (0.4)                                           | 0 (0.0)                                          |
| Pulmonary embolism                  | 1 (0.4)                                           | 0 (0.0)                                          |

COVID-19, coronavirus disease 2019; d, dexamethasone; K, carfilzomib; R, lenalidomide; TEAE, treatment-emergent adverse event.

**Supplemental Table 5. Screened patients excluded from randomization**

| Eligibility criteria                                                                                                                                                                                                                                                                        | Number of patients excluded* |
|---------------------------------------------------------------------------------------------------------------------------------------------------------------------------------------------------------------------------------------------------------------------------------------------|------------------------------|
| ANC < $1 \times 10^9$ /L within 21 d prior to randomization. Screening ANC should be independent of growth factor support for $\geq 1$ wk.                                                                                                                                                  | 23                           |
| Calculated or measured creatinine clearance < 1.0 mL/s (calculation must be based on the Cockcroft-Gault formula) within 21 d prior to randomization.                                                                                                                                       | 15                           |
| Hemoglobin < 80 g/L within 21 d prior to randomization. Use of erythropoietic stimulating factors and RBC transfusions per institutional guidelines is allowed; however, most recent RBC transfusion must not have been performed within 7 d prior to obtaining screening hemoglobin level. | 20                           |
| Hepatic dysfunction within 21 d prior to randomization: bilirubin $\geq 1.5$ x ULN; AST or ALT $\geq 2.5$ x ULN.                                                                                                                                                                            | 15                           |
| Platelet count < $50 \times 10^9$ /L ( $\leq 30 \times 10^9$ /L if myeloma involvement in the bone marrow is > 50%) within 28 d prior to randomization. Patients should not have received platelet transfusions for $\geq 1$ wk prior to obtaining the screening platelet count.            | 18                           |
| Uncontrolled hypertension, defined as blood pressure $\geq 160$ mmHg systolic or $\geq 100$ mmHg diastolic, in accordance with the European Society of Hypertension/European Society of Cardiology 2018 guidelines.                                                                         | 8                            |
| Plasma cell leukemia ( $> 2.0 \times 10^9$ /L circulating plasma cells by standard differential).                                                                                                                                                                                           | 1                            |
| Left ventricular ejection fraction < 40%, assessed by transthoracic ECHO.                                                                                                                                                                                                                   | 1                            |
| Calculated or measured creatinine clearance < 30 mL/min (calculation must be based on the Cockcroft-Gault formula) within 28 d prior to randomization.                                                                                                                                      | 1                            |

ALT, alanine aminotransferase; ANC, absolute neutrophil count; AST, aspartate aminotransferase; ECHO, echocardiogram; RBC, red blood cell; ULN, upper limit of normal.

\*There was a total of 150 screen failures; however, some patients were excluded based on > 1 eligibility criterion.

## Supplemental Figure 1. Subgroup analysis of ORR.

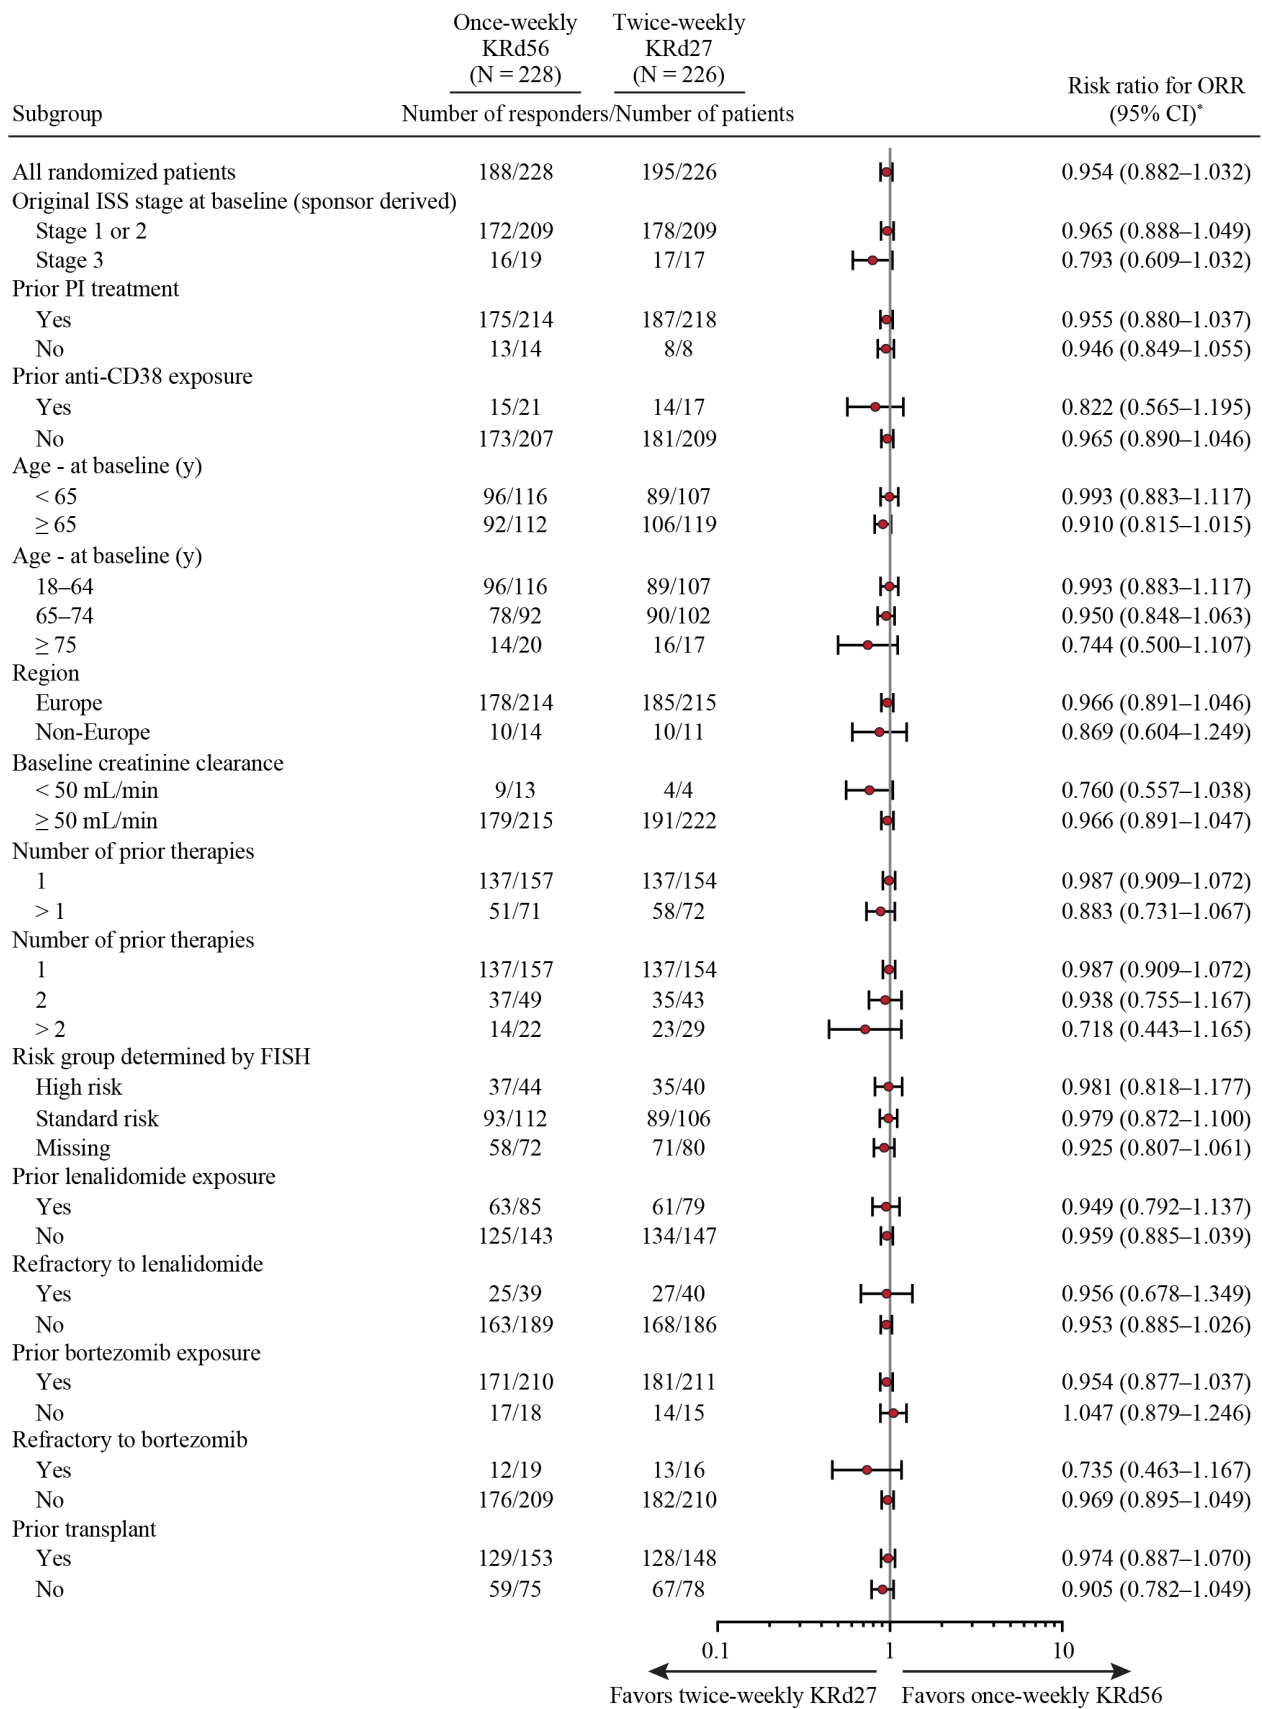

BIW, twice-weekly; CI, confidence interval; FISH, fluorescence in-situ hybridization; ISS, International Staging System; KRd, carfilzomib-lenalidomide-dexamethasone; KRd27, carfilzomib (27 mg/m<sup>2</sup>)-

lenalidomide-dexamethasone; KRd56, carfilzomib (56 mg/m<sup>2</sup>)-lenalidomide-dexamethasone; ORR, overall response rate; PI, proteasome inhibitor; QW, once-weekly.

\*The risk ratios and 95% CIs were calculated using the Cochran-Mantel-Haenszel method, controlling for randomization stratification factors. Stratification factors included the original ISS stage at study entry (stage 1 or 2 vs stage 3), prior lenalidomide treatment (yes vs no), prior PI treatment (yes vs no), and prior anti-CD38 exposure (yes vs no).

## References

1. Richardson PG, Xie W, Jagannath S, et al. A phase 2 trial of lenalidomide, bortezomib, and dexamethasone in patients with relapsed and relapsed/refractory myeloma. *Blood*. 2014;123(10):1461-1469.
2. Moreau P, Masszi T, Grzasko N, et al. Oral ixazomib, Lenalidomide, and Dexamethasone for Multiple Myeloma. *N Engl J Med*. 2016;374(17):1621-1634.
3. Dimopoulos MA, Oriol A, Nahi H, et al. Daratumumab, Lenalidomide, and Dexamethasone for Multiple Myeloma. *N Engl J Med*. 2016;375(14):1319-1331.
4. Palumbo A, Chanan-Khan A, Weisel K, et al. Daratumumab, Bortezomib, and Dexamethasone for Multiple Myeloma. *N Engl J Med*. 2016;375(8):754-766.
5. Attal M, Richardson PG, Rajkumar SV, et al. Isatuximab plus pomalidomide and low-dose dexamethasone versus pomalidomide and low-dose dexamethasone in patients with relapsed and refractory multiple myeloma (ICARIA-MM): a randomised, multicentre, open-label, phase 3 study. *Lancet*. 2019;394(10214):2096-2107.
6. Voorhees PM, Suman VJ, Tuchman SA, et al. A phase I/II study of ixazomib, pomalidomide, and dexamethasone for lenalidomide and proteasome inhibitor refractory multiple myeloma (Alliance A061202). *Am J Hematol*. 2021;96(12):1595-1603.
7. Richardson PG, Oriol A, Beksac M, et al. Pomalidomide, bortezomib, and dexamethasone for patients with relapsed or refractory multiple myeloma previously treated with lenalidomide (OPTIMISMM): a randomised, open-label, phase 3 trial. *Lancet Oncol*. 2019;20(6):781-794.
8. Stewart AK, Rajkumar SV, Dimopoulos MA, et al. Carfilzomib, lenalidomide, and dexamethasone for relapsed multiple myeloma. *N Engl J Med*. 2015;372(2):142-152.
9. Dimopoulos M, Quach H, Mateos M-V, et al. Carfilzomib, dexamethasone, and daratumumab versus carfilzomib and dexamethasone for patients with relapsed or refractory multiple myeloma (CANDOR): results from a randomised, multicentre, open-label, phase 3 study. *Lancet*. 2020;396(10245):186-197.
